# Supplementary material for: Reconstituted and frozen botulinum toxin A is as effective and safe as fresh for treating axillary hyperhidrosis: A retrospective study
Source: PLoS One. 2023 Dec 4;18(12):e0295393. doi: 10.1371/journal.pone.0295393 (PMC10695379; doi:10.1371/journal.pone.0295393)
Supplement: S1 Data — (XLSX) [file pone.0295393.s003.xlsx]

## Sheet: Data
Code	Age	Sex	Drug	Frozen code	PH	Onset	Comorb	Prev. Treatment	Effect duration	U per axilla	VAS L	VAS R	HDSS L	HDSS R	VAS W24 L	VAS W24 R	HDSS W24 L	HDSS W24 R	Side-effects	Side-Effects com
1	36	2	1	1	1	14	2	1	10	90	9	10	4	4	0	0	1	1	1	One week injectionpain
8	26	2	2	1	1	14	2	1	3	44	8	8	3	3	7	7	3	3	2
2	28	2	1	1	1	16	2	1	2	85.5	8	8	2	2	8	8	3	3	1	Compensation sweating breast and back aprox. one months
9	28	2	2	1	1	14	2	1	8	38	10	10	4	4	7	7	3	3	2
3	26	2	1	1	1	14	2	1	5	90	8	8	3	3	6	6	3	3	2
10	32	1	2	1	1	20	2	1	7	40	7	7	3	3	3	3	2	2	2
4	21	2	1	1	1	13	2	1	8	90	8	10	3	4	0	0	1	1	2
11	44	2	2	1	1	11	1	1	3	40	7	7	4	4	3	3	2	2	2
5	16	2	1	1	1	14	2	1	6	76.5	8	8	3	3	6	6	2	2	1	Weaknes in the hands one month
13	46	1	2	1	1	17	2	1	6	50	8	8	3	3	0	1	1	1	2
6	24	1	1	1	1	12	2	1	8	99	7	7	3	3	6	6	2	2	2
17	19	2	2	1	1	13	2	1	5	36	7	7	2	2	4	4	2	2	2
7	24	1	1	1	1	13	2	1	8	99	8	8	3	3	6	6	2	2	2
12	54	2	2	1	1	9	1	1	12	44	9	9	4	4	5	5	1	1	2
14	41	1	1	1	1	20	1	1	10	94.5	7.5	7.5	2	2	0	0	1	1	2
23	23	2	2	2	1	14	2	2		36	9	9	3	3	4	4	2	2	2
15	20	2	1	1	1	14	2	1	4	90	9	9	4	4	9	9	4	4	2
24	27	2	2	2	1	15	2	1	6	48	8	8	3	3	7	7	3	3	2
16	25	2	1	1	1	13	1	1	4	103.5	9	9	4	4	8	8	3	3	2
18	30	2	2	1	1	12	1	1	8	40	10	10	4	4	6	6	2	2	2
20	51	1	1	2	1	25	2	1	9	112.5	7	7	3	3	2	2	2	2	2
29	32	1	2	2	1	17	1	1	6	46	10	10	4	4	10	10	4	4	2
21	19	2	1	2	1	13	1	2		94.5	9	9	3	3	4.5	4.5	2	2	2
34	24	2	2	2	1	21	2	2		42	7	8	2	3	4	6	2	3	2
22	44	2	1	2	1	15	2	1	12	90	9	9	4	4	2	2	1	1	2
25	30	1	2	2	1	22	2	2		50	6	6	3	3	6	6	3	3	2
26	25	1	1	2	1	16	2	1	6	112.5	7	7	3	3	5	5	2	2	2
35	24	2	2	2	1	13	2	1	4	44	8	8	3	3	10	10	4	4	2
27	36	1	1	2	1	16	1	1	7	99	8	8	3	3	5	5	2	2	2
56	51	2	2	1	1	14	2	1	6	54	8	8	3	3	7	7	3	3	1	Weakness in the hands several weeks
28	30	2	1	2	1	15	2	1	4	108	8	8	3	3	8	8	3	3	2
57	28	1	2	1	1	13	1	1	8	48	7	7	3	3	4	4	2	2	2
33	35	1	1	2	2	16	2	1	7	44	8	8	4	4	5	5	2	2	2
58	27	2	2	1	1	14	2	1	6	42	8	8	3	3	5.7	5.8	3	3	2
30	21	2	1	2	1	13	2	1	6	48	10	10	4	4	5	5	2	2	1	Compensation sweating tighs
59	20	2	2	2	1	18	1	1	9	42	9	9	4	4	7	7	3	3	2
19	44	1	1	2	1	20	2	1	9	50	8	8	4	4	2	2	1	1	2
60	44	2	2	2	1	20	1	1	5	46	7	7	3	3	3	3	2	2	2
31	28	2	1	2	1	12	1	1	5	40	8	8	3	3	8	8	3	3	2
61	32	2	2	2	1	11	1	1	8	44	7.5	7.5	3	3	3	3	1	1	2
32	29	2	1	2	1	18	1	1	7	44	8	9	3	3	6	7	3	3	2
36	39	2	2	2	1	17	2	1	6	46	9	9	4	4	5	6	2	2	2
37	43	2	1	2	1	15	1	1	9	108	7	7	2	3	2	1	1	1	2
62	19	2	2	2	1	16	2	1	6	46	8	8	3	3	3	3	2	2	2
38	30	2	1	2	1	12	1	1	6	99	8	7	3	2	5	2	1	1	2
46	15	1	2	2	1	10	1	2		40	8	9	3	3	5	5	3	3	2
39	39	2	1	2	1	15	2	1	8	99	7	7	3	3	4	4	1	1	2
48	52	2	2	2	1	15	2	1	10	38	9	9	4	4	8	8	4	4	2
40	40	2	1	2	1	17	2	1	9	112.5	9	9	4	4	1.9	1.6	2	2	2
50	45	1	2	2	1	25	2	1	12	44	9	9	4	4	2	2	2	2	2
41	40	2	1	2	1	14	1	1	11	85.5	6	7	3	3	4	2	2	1	2
52	30	2	2	2	1	16	1	1	5	52	8	8	3	3	5	5	2	2	2
42	26	2	1	2	1	11	1	1	9	90	8	8	3	3	0	0	1	1	1	Bromhidrosis several weeks
54	43	2	2	2	1	14	2	1	12	38	8	8	4	4	0	0	1	1	2
43	26	2	1	2	1	13	2	1	3	94.5	7	7	2	2	2	2	2	2	2
63	27	2	2	2	1	24	2	1	6	44	9	9	2	2	9	9	2	2	1	Vertigo several days
44	35	2	1	2	1	16	2	1	7	103	7	9	2	3	3	5	2	3	2
70	19	2	2	2	1	17	2	2		42	7	7	3	3	5	5	2	2	2
45	25	1	1	2	1	20	2	1	10	112.5	8	8	2	2	6	6	2	2	2
71	16	2	2	1	1	13	2	1	8	42	7	7	3	3	4	6	2	2	2
47	22	2	1	2	1	15	2	1	6	80	7	7	2	2	5	6	2	2	2
72	25	2	2	1	1	16	2	1	10	42	4	4	2	2	7	7	2	2	2
49	19	2	1	2	1	15	2	1	8	80	7	7	3	3	4	4	2	2	2
73	20	1	2	1	1	16	2	1	6	42	10	10	4	4	5	5	2	2	1	Compensation sweating hands 2 weeks
51	24	2	1	2	1	9	2	1	6	84	8	8	4	4	6	6	2	2	2
74	55	1	2	1	1	18	2	1	9	48	4	4	3	3	4	4	1	1	1	Compensation sweating tighs 2-3 weeks
53	41	1	1	2	1	6	1	1	10	100	8	8	3	3	7	7	3	3	2
75	40	1	2	1	1	28	2	1	14	46	7	7	4	4	4	6	2	2	2
55	31	2	1	1	1	15	2	1	12	84	8	8	3	3	2	2	1	1	2
76	33	2	2	1	1	16	2	1	5	42	8	8	3	3	5	6	2	2	2
64	26	2	1	2	1	10	2	1	2	96	9	9	3	3	10	10	2	2	2
77	16	2	2	1	1	14	2	2		40	7.5	7.5	3	3	1	1	1	1	2
65	17	2	1	2	1	14	2	1	7	76	8	8	4	4	3	3	1	1	2
78	38	2	2	1	1	30	1	1	10	40	8	8	2	2	5	4	1	1	2
66	22	2	1	2	1	15	1	1	5	84	8	8	4	4	8	8	3	3	1	Vertigo one day
79	33	2	2	1	1	25	2	1	12	44	9.5	9.5	4	4	8	8	3	3	2
67	24	2	1	2	1	16	2	1	6	92	8	9	3	3	3	3	1	1	2
80	39	2	2	1	1	30	1	1	12	44	6	6	3	3	1	1	2	2	2
68	18	1	1	1	1	10	2	1	10	80	6	6	2	2	2	2	1	1	1	Wekaness in fingers for some weeks
81	26	1	2	2	1	10	1	1	3	44	7	7	2	2	5	5	2	2	2
69	43	2	1	1	1	12	1	1	10	100	9	9	4	4	2	2	1	1	1	Itch at the injection site for a week
82	23	2	2	2	1	12	2	2		42	8	8	3	3	6	6	1	1	2
83	24	2	1	1	1	12	2	1	5	84	8	8	3	3	3	3	2	2	2
95	22	2	2	2	1	13	1	1	6	44	10	10	4	4	7	7	2	2	2
84	38	1	1	1	1	24	2	1	6	96	8	8	3	3	3	3	2	2	2
92	39	1	2	2	1	16	2	1	8	48	8	8	3	3	3	3	2	2	2
85	49	2	1	1	1	20	2	1	10	92	9	9	4	4	0	0	1	1	2
93	24	2	2	1	1	12	2	1	12	48	7	7	2	2	3	3	1	1	1	Pain in the armpits for several weeks
86	37	2	1	1	1	12	2	1	10	76	9	9	4	4	7	7	4	4	2
94	30	2	2	1	1	15	2	2		42	10	10	4	4	3	3	1	1	2
87	28	2	1	1	1	12	2	1	10	88	9	9	3	3	1	1	1	1	2
96	21	2	2	2	1	17	2	1	9	46	10	10	4	4	2	2	1	1	1	Injection pain 1-2 weeks
88	30	2	1	1	1	18	2	1	10	100	7	7	3	3	0	0	1	1	2
101	41	2	2	1	1	19	1	1	6	42	8	8	3	3	7	7	3	3	2
89	47	2	1	1	1	13	1	1	6	88	6	9	3	3	2	2	1	1	2
102	19	2	2	1	1	15	1	1	8	44	9	9	4	4	5	5	1	1	2
90	53	2	1	1	1	14	2	1	8	96	7	7	3	3	1.3	1.3	1	1	2
103	22	2	2	1	1	13	2	1	11	44	10	10	4	4	0	0	1	1	1	Compensation sweatng hands 2-4 weeks
91	29	2	1	1	1	14	1	1	5	88	9	9	3	3	8	8	4	4	2
104	26	2	2	1	1	12	2	1	10	40	7	7	2	2	1	1	1	1	2
97	19	1	1	1	1	18	2	1	5	92	8	8	3	3	6	6	2	2	2
105	23	2	2	1	1	15	2	1	6	46	10	10	4	4	8	8	3	3	2
98	25	2	1	1	1	13	2	1	8	100	9	9	3	3	4	4	1	1	2
106	29	1	2	1	1	19	2	1	8	48	8	8	3	3	4	4	2	2	2
99	32	1	1	1	1	12	2	1	10	88	7.5	7.5	3	3	2	2	1	1	2
100	38	2	1	1	1	11	2	1	12	96	8	8	3	3	2	2	1	1	2

## Sheet: Codes
Sex		Drug	Frozen	Frozen code		PH		Comorbiditet		Previous treatment with btx-A				U per axilla		W	Side-effects
Man=1		Dsyport =1	Days	2 months=1		Axillary Hyperhidrosis=1		Yes=1		Yes=1				Units of btx-A		Weeks	Yes=1
Woman=2		Botox=2		6 months=2				No=2		No=2							No=2
